# Supplementary material
Source: PubMed Central journal article supplement (PMC7953450)
Supplement: mmc1.pdf [file mmc1.pdf]

**Supplemental information**

**Linear epitope landscape of the SARS-CoV-2 Spike  
protein constructed from 1,051 COVID-19 patients**

**Yang Li, Ming-liang Ma, Qing Lei, Feng Wang, Wei Hong, Dan-yun Lai, Hongyan Hou, Zhao-wei Xu, Bo Zhang, Hong Chen, Caizheng Yu, Jun-biao Xue, Yun-xiao Zheng, Xue-ning Wang, He-wei Jiang, Hai-nan Zhang, Huan Qi, Shu-juan Guo, Yandi Zhang, Xiaosong Lin, Zongjie Yao, Jiaoxiang Wu, Huiming Sheng, Yanan Zhang, Hongping Wei, Ziyong Sun, Xionglian Fan, and Sheng-ce Tao**

**Linear epitope landscape of the SARS-CoV-2 Spike protein constructed from 1,051 COVID-19 patients**

*Li et al.*

**Supplemental figures**

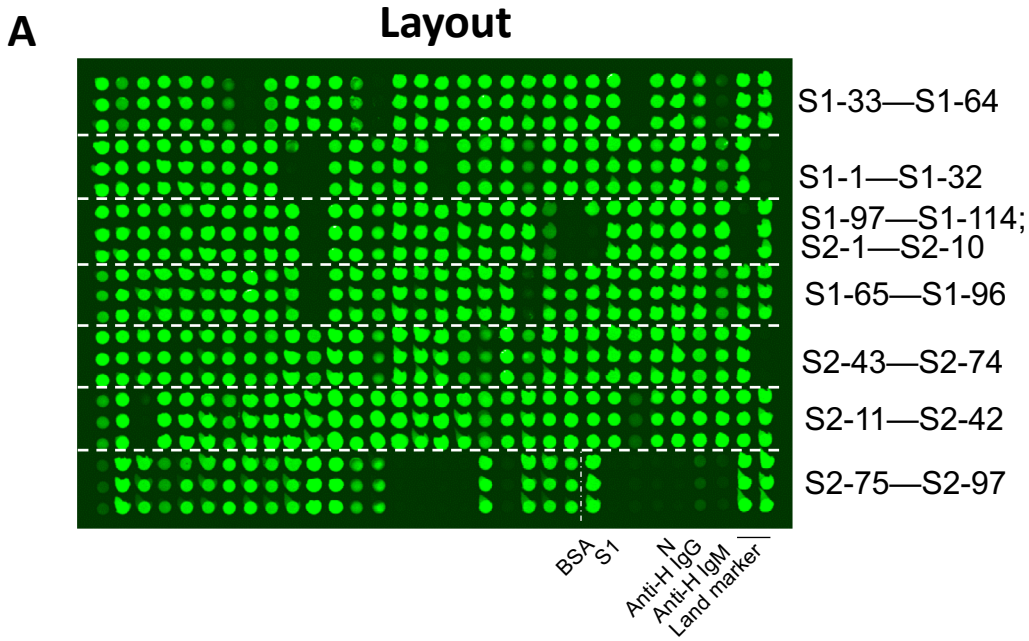

**B** **A patient serum (IgG)**

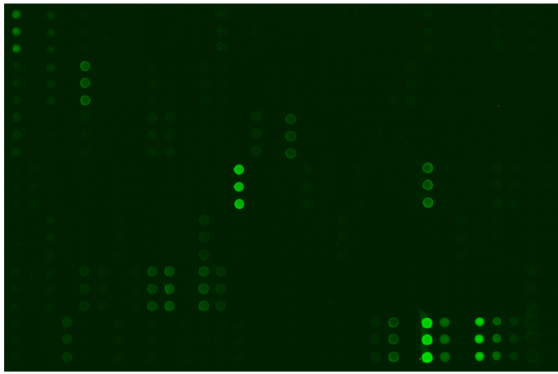

**C** **A control serum (IgG)**

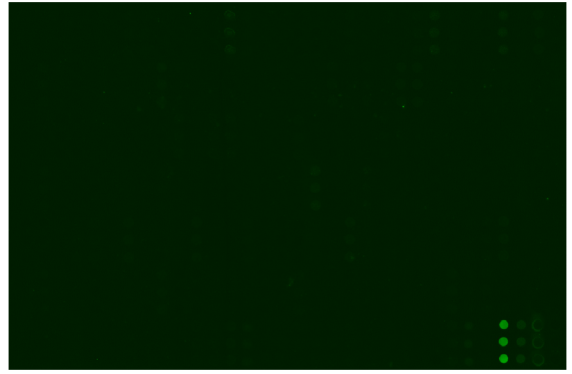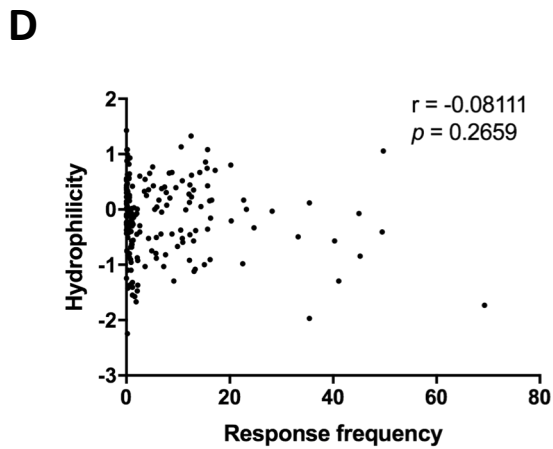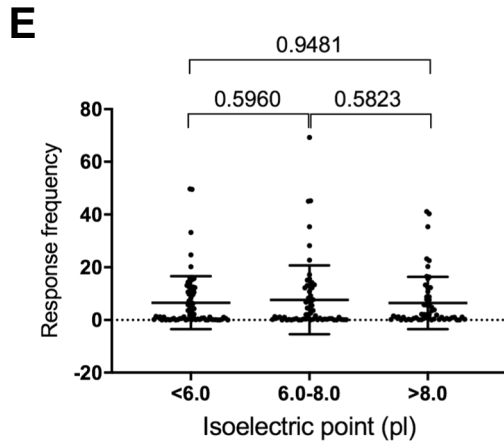

**Figure S1. The peptide microarray (related to Figure 1 and Table S1).** **A.** The layout of the peptide microarray that was used in this study (Table S1). **B.** An example array probed with COVID-19 patient serum. **C.** An example array probed with a control serum. **D.** Correlations between the hydrophobicity and the response frequency of the epitopes. Each spot indicates one peptide. The P value was calculated with the two-sided F-test. **E.** Statistical analysis of the response frequency of the peptides with low, medium and high pI values. The P value was calculated with the two-sided t-test.



**Figure S2. The distribution of the highly immunogenic epitopes on the Spike protein (related to Figure 1). A-B. A.** The 3D structure of the spike protein is used (PDB ID: 6X6P). The section from S2-78 to the end of the C-terminus was modelled using C-I-TASSER. The 19 significant epitopes are marked in red on the 3D structure of the Spike protein for both the trimer (**A**) and the monomer (**B**). **C.** The area of solvent accessibility (ASA) of each amino acid on the indicated epitope for trimer and monomer format concerning an S protein trimer structure (PDB: 6X6P).

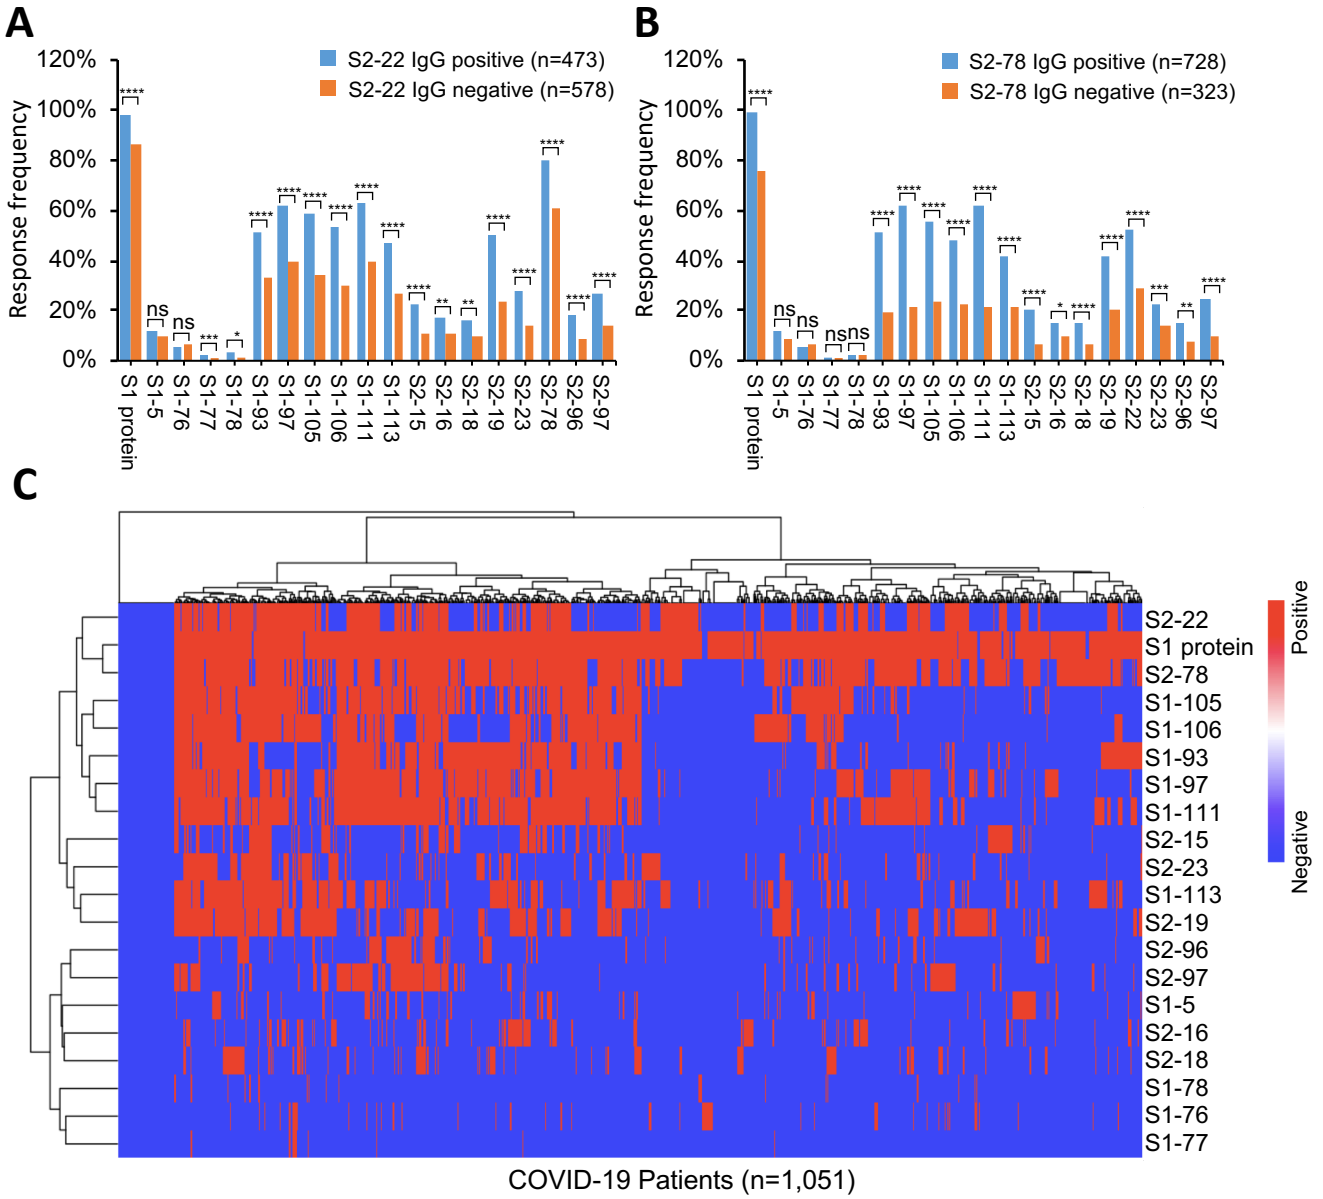

**Figure S3. IgG response signatures against Spike liner epitopes in COVID-19 patients (related to Figure 1).**  
**A-B.** The response frequency for each epitope in the two groups as S2-22 (**A**) or S2-78 (**B**) IgG positive or negative. The  $P$  value was calculated with the  $\chi^2$  test. \*,  $P < 0.05$ ; \*\*,  $P < 0.01$ ; \*\*\*,  $P < 0.001$ ; \*\*\*\*,  $P < 0.0001$ ; ns, not significant. **C** Heatmap of clustering analysis IgG response signatures for COVID-19 patients. Each patch indicates positive (red) or negative (blue) IgG response against the significant epitope or S1 protein (row) in one patient (column).

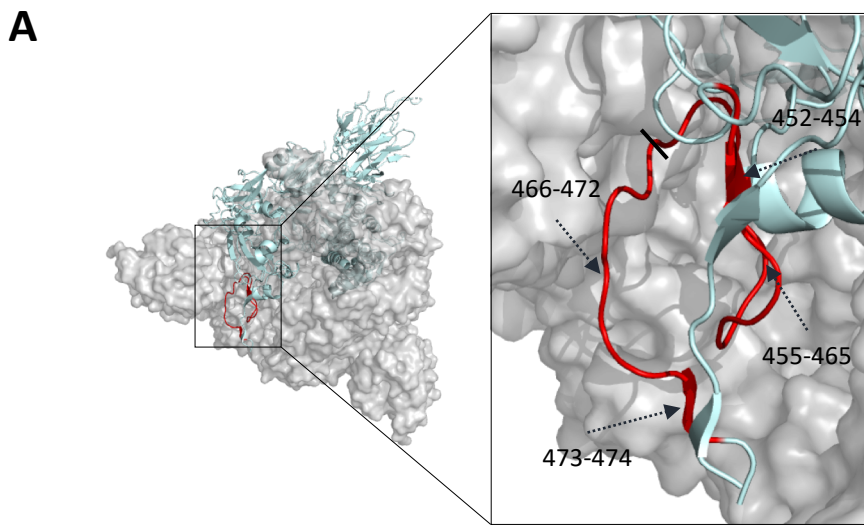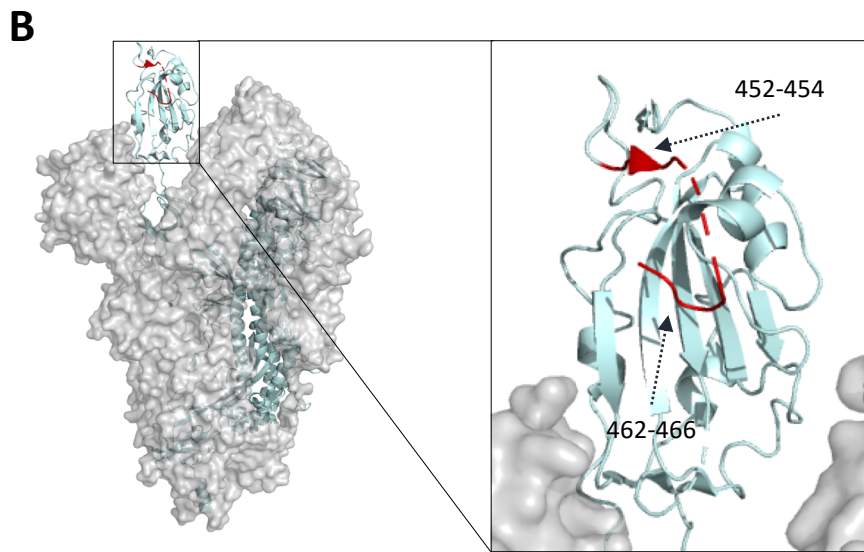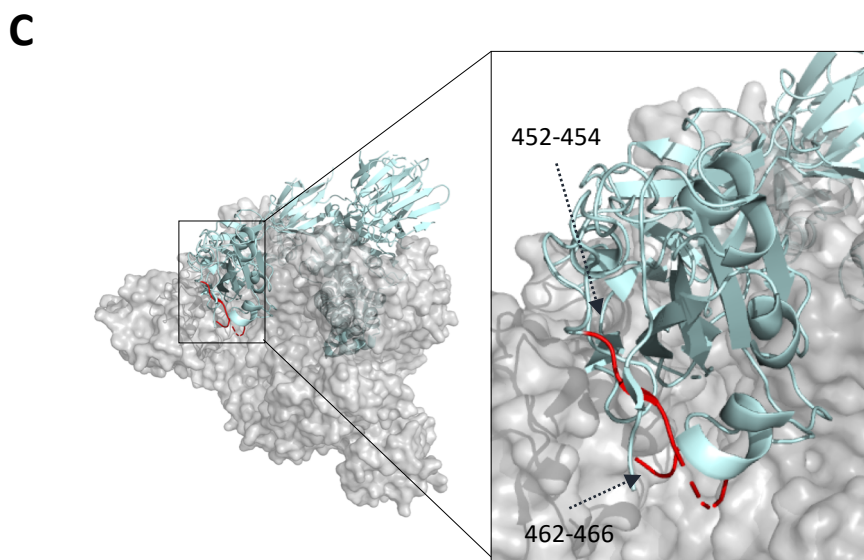

**Figure S4. The location of S1-76/77/78 on the RBD (related to Figure 4).** **A.** A top-down view of the closed-state Spike protein trimer (PDB: 6X6P). **B.** A side view of the open-state Spike protein trimer (PDB ID: 6VYB). **C.** A top-down view of the open-state Spike protein trimer (PDB ID: 6VYB). The significant epitopes (S1-76/77/78, aa451-474) are marked in red.

**A**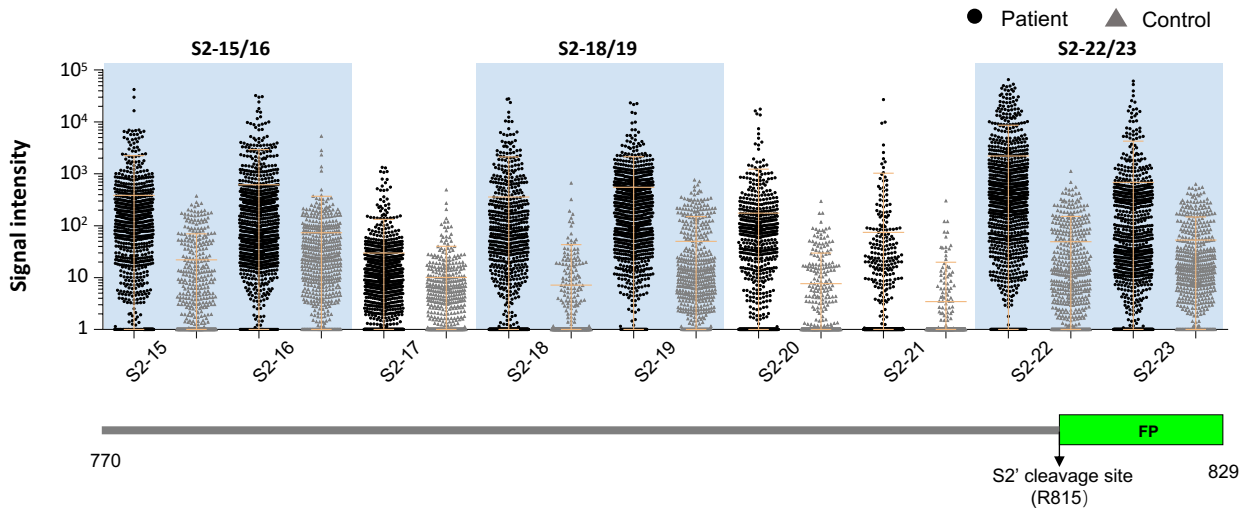**B**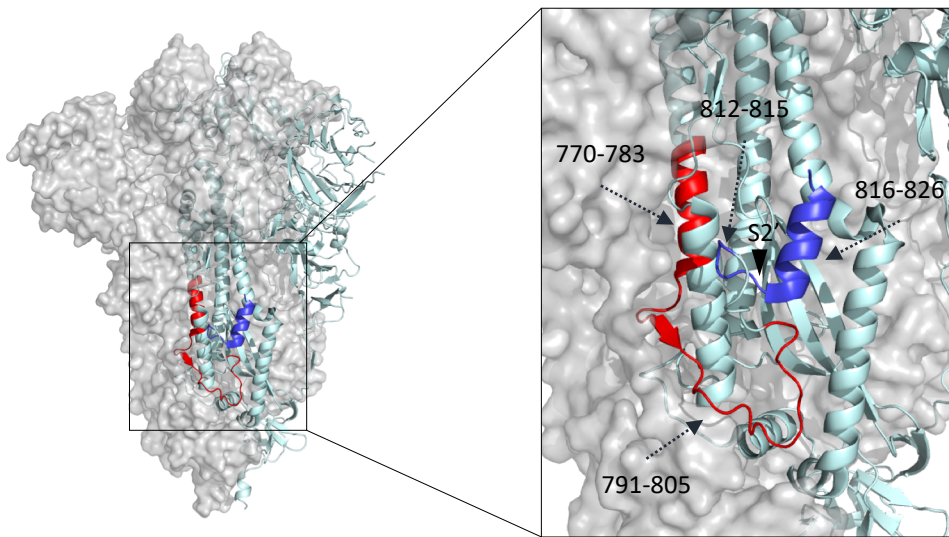**C**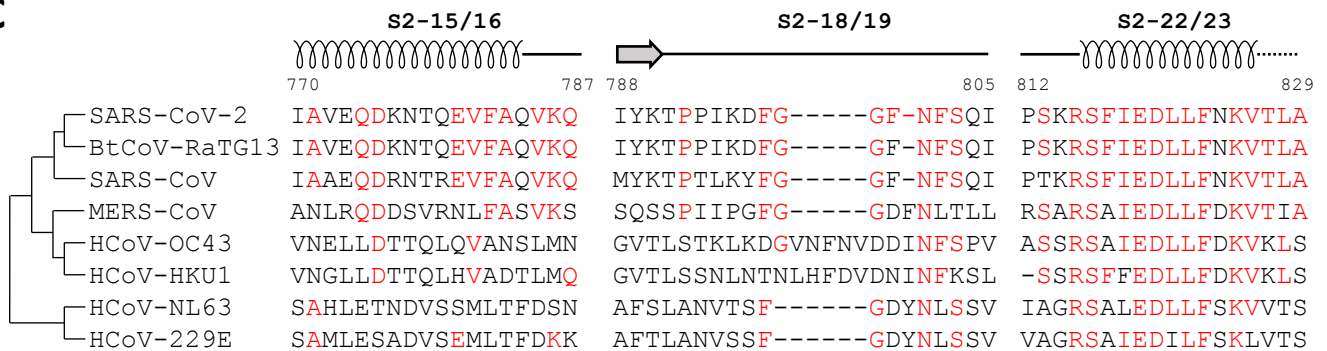

**Figure S5. The 2<sup>nd</sup> hot spot of highly immunogenic linear epitopes: S2'cleavage site and FP (related to Figure 5).**

The S2'cleavage site and FP in the linear epitope landscape. **B.** The significant epitopes are located in this region. S2-15/16, aa770-787, red, coil; S2-18/19, aa788-805, red, loop; and S2-22/23, aa812-829, blue, coil. **C.** The homology analysis of the significant epitopes among the 7 known human coronaviruses and bat coronavirus BtCoV-RaTG13. The amino acids with consistencies  $\geq 50\%$  among the 8 coronaviruses are marked in red. The loop,  $\alpha$ -helix and  $\beta$ -strand region are shown as a line, a coil and an arrow above the sequences, respectively. An unobserved structure is shown as a dotted line.



**A**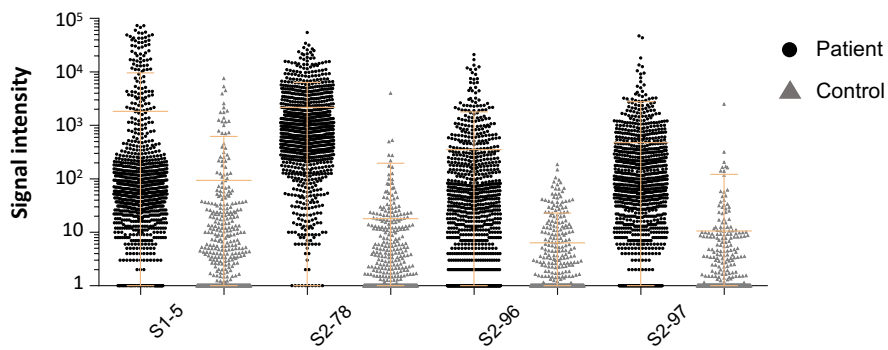**B**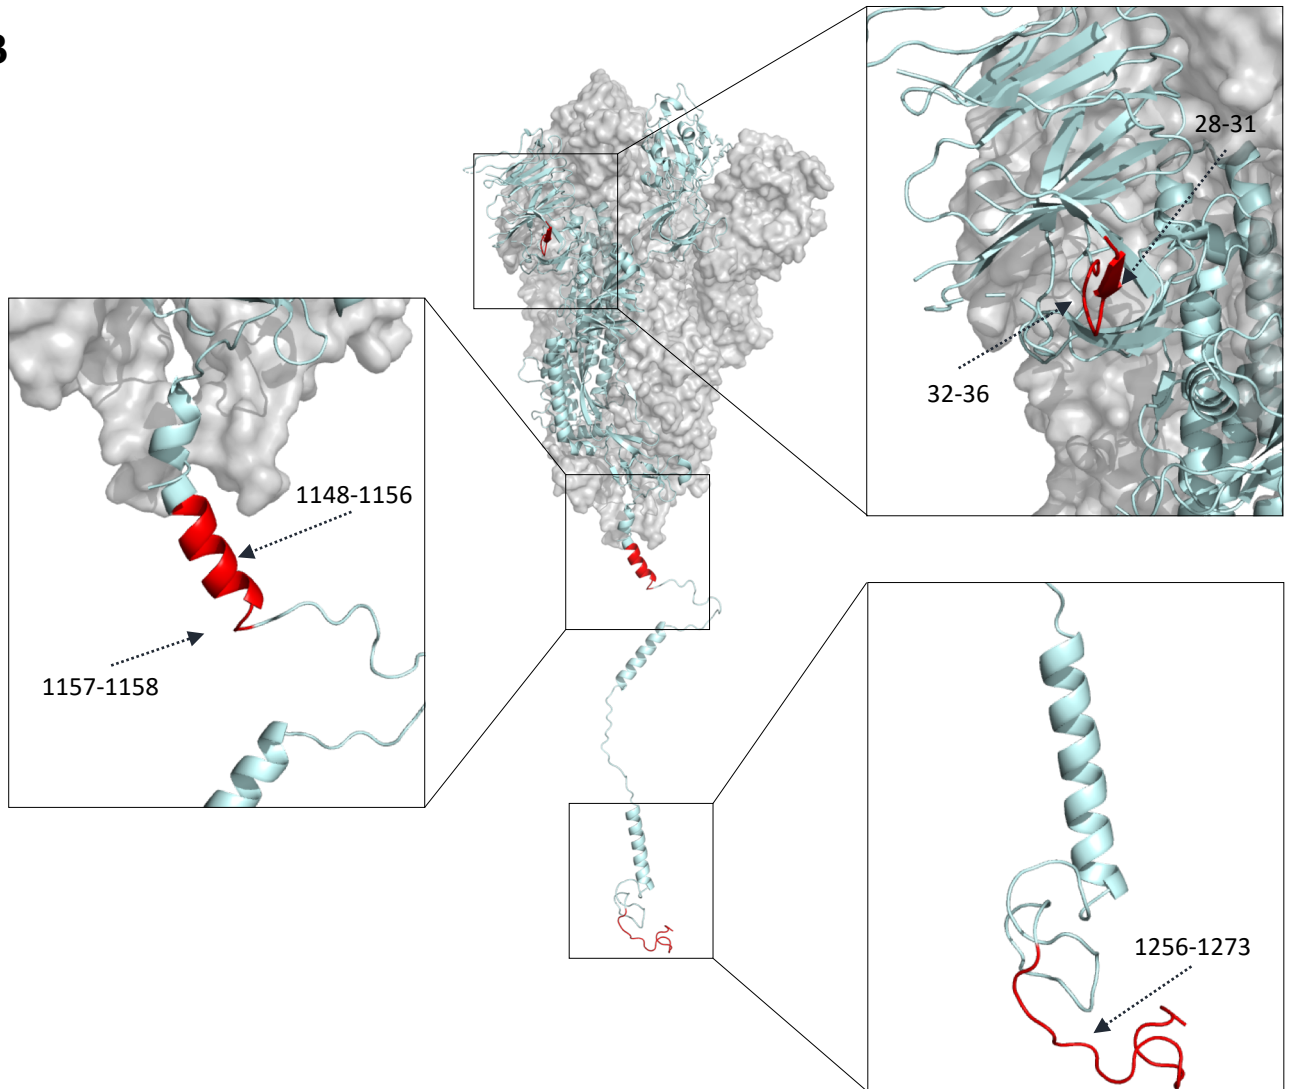**C**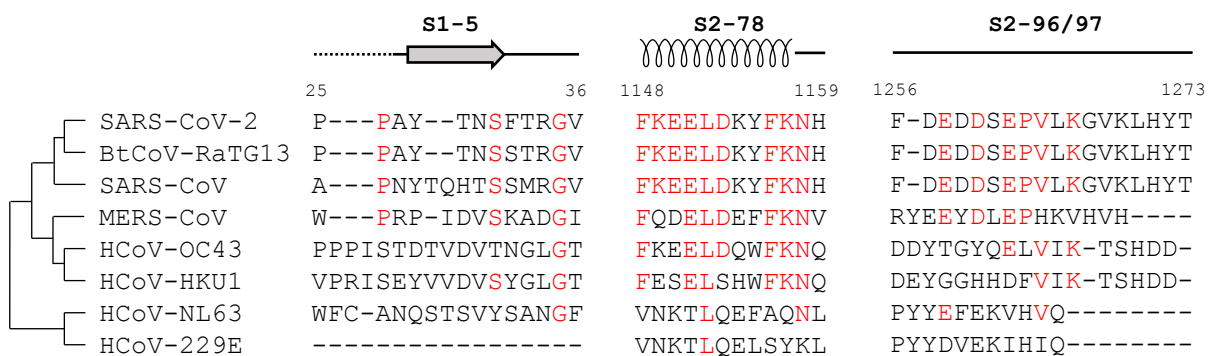

Figure S6. Other highly immunogenic linear epitopes (related to Figure 5)

**Figure S6. Other highly immunogenic linear epitopes (related to Figure 5).** **A.** An additional 5 significant epitopes that do not belong to the two “hot spots”. **B.** The significant epitopes are located on the Spike protein. S1-5, aa25-36, red; S2-78, aa1148-1159, red; and S2-96/97, aa1256-1273, red. **C.** The homology analysis of the significant epitopes among the 7 known human coronaviruses and the bat coronavirus BtCoV-RaTG13. The amino acids with consistencies  $\geq 50\%$  among the 8 coronaviruses are marked in red. The loop,  $\alpha$ -helix and  $\beta$ -strand region are shown as a line, a coil and an arrow above the sequences, respectively. An unobserved structure is shown as a dotted line.

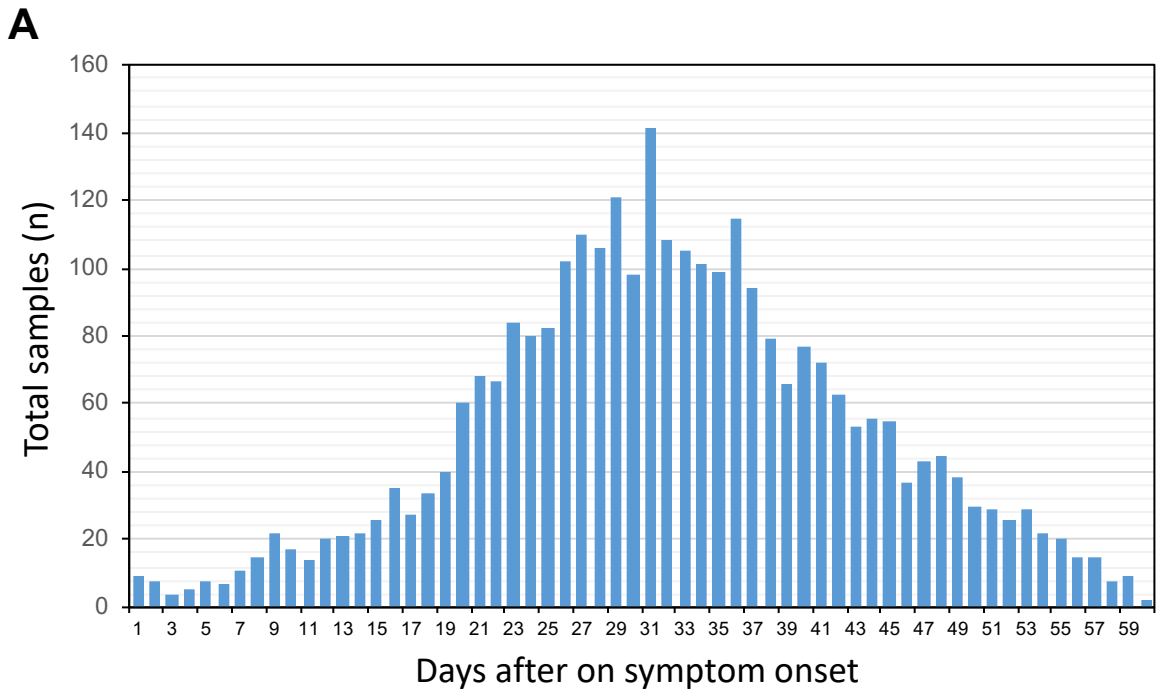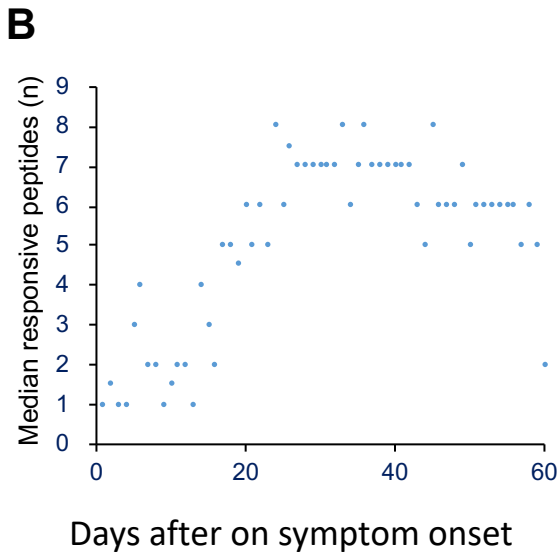

**Figure S7. Dynamic changes in responsive epitope numbers (related to Figure 6).** **A.** The number of serum samples for each day. **B.** The median number of responsive peptides for the samples collected at the indicated time point.
